# Supplementary material for: Sleep and Preteen Delinquency: Is the Association Robust to ADHD Symptomatology and ADHD Diagnosis?
Source: Springer Nature journal article supplement (doi:10.1007/s10862-017-9610-1), 2017-06-20
Supplement: MOESM1 [file 12456412]

Supplementary Table 1: Frequency of Delinquent Acts

| Variable | Proportion/  Mean | Standard Deviation | N |
| --- | --- | --- | --- |
| ***Preteen Delinquency*** |  |  |  |
| Smokes/Chews/Sniffs Tobacco | .004 | .065 | 3,333 |
| Uses Alcohol or Drugs | .010 | .010 | 3,333 |
| Gets Drunk | .009 | .055 | 3,313 |
| Is Truant/Skips School | .009 | .093 | 3,329 |
| Vandalizes | .019 | .137 | 3,327 |
| Steals at Home | .044 | .204 | 3,332 |
| Steals Outside the Home | .036 | .186 | 3,332 |
| Sets Fires | .015 | .123 | 3,330 |
| Runs Away | .011 | .102 | 3,335 |
| Frequently Gets in Fights | .085 | .278 | 3,329 |
| Is Cruel to Animals | .030 | .171 | 3,324 |
