# Supplementary material for: Sleep and Preteen Delinquency: Is the Association Robust to ADHD Symptomatology and ADHD Diagnosis?
Source: Springer Nature journal article supplement (doi:10.1007/s10862-017-9610-1), 2017-06-20
Supplement: MOESM2 [file 12456412]

|  | **ADHD Symptomatology** | |
| --- | --- | --- |
| ***Predictors*** | **B, Beta**  **(SE)** | **B, Beta**  **(SE)** |
| Sleep Problems | **.25, .25**  **(.02)** | - |
| Sleep Duration | - | **-.02, -.04**  **(.01)** |
| Age (in years) | -.04, -.02  (.04) | **-.09, -.05**  **(.03)** |
| Sex (male = 1) | **.21, .19**  **(.03)** | **.24, .22**  **(.02)** |
| Race (nonwhite = 1) | .00, .00  (.03) | .01, .01  (.03) |
| Household Income | **-.03, -.07**  **(.01)** | **-.02, -.06**  **(.01)** |
| Parental Education | .00, .01  (.01) | .01, .02  (.01) |
| Parental Involvement | -.02, -.02  (.02) | -.03, -.03  (.02) |
| Parental Low Self-Control | **.04, .08**  **(.01)** | **.06, .10**  **(.01)** |
| Paternal Incarceration | **.15, .13**  **(.03)** | **.17, .15**  **(.02)** |
| Parental Smoking | **.07, .06**  **(.03)** | **.10, .08**  **(.03)** |
| N | 1575 | 2198 |

Supplementary Table 2: Do Sleep Problems and Sleep Duration predict Scores on the Parent/Teacher-rated ADHD Symptomatology Scale?
