# Supplementary material for: Sleep and Preteen Delinquency: Is the Association Robust to ADHD Symptomatology and ADHD Diagnosis?
Source: Springer Nature journal article supplement (doi:10.1007/s10862-017-9610-1), 2017-06-20
Supplement: MOESM3 [file 12456412]

Supplementary Table 3: Sleep and Preteen Delinquency: Does ADHD Symptomatology and/or Diagnosis Attenuate the Association?[[1]](#footnote-1)

|  | **Preteen Delinquency** | | | | | |
| --- | --- | --- | --- | --- | --- | --- |
| ***Predictors*** | **OR**  **(CI)** | **OR**  **(CI)** | **OR**  **(CI)** | **OR**  **(CI)** | **OR**  **(CI)** | **OR**  **(CI)** |
| Sleep Problems | 1.13  (.88-1.47) | **1.37**  **(1.08-1.75)** | 1.06  (.81-1.38) | - | **-** | - |
| Sleep Duration | - | - | - | **.85**  **(.75-.96)** | **.84**  **(.75-.95)** | **.85**  **(.75-.96)** |
| ADHD Symptomatology | **6.90**  **(5.15-9.25)** | **-** | **6.00**  **(4.43-8.13)** | **6.87**  **(5.36-8.80)** | - | **5.94**  **(4.57-7.72)** |
| ADHD Diagnosis | - | **4.29**  **(2.98-6.17)** | **1.96**  **(1.31-2.593)** | **-** | **4.65**  **(3.42-6.34)** | **1.82**  **(1.29-2.57)** |
| N | 1554 | 1553 | 1553 | 2141 | 2139 | 2139 |

1. ADHD symptomatology measure is continuous. Controls for age, sex, race, household income, parental education, parental involvement, parental self-control, paternal incarceration, and parental smoking are included in each model in tables 2 and 3. OR = Odds Ratio; CI = Confidence Interval. Statistically significant ORs and CIs are bolded. [↑](#footnote-ref-1)
