# Supplementary material for: Sleep and Preteen Delinquency: Is the Association Robust to ADHD Symptomatology and ADHD Diagnosis?
Source: Springer Nature journal article supplement (doi:10.1007/s10862-017-9610-1), 2017-06-20
Supplement: MOESM4 [file 12456412]

|  | **ADHD Symptomatology** | | **ADHD Diagnosis** | | **Preteen Delinquency** | |
| --- | --- | --- | --- | --- | --- | --- |
| ***Predictors*** | **OR**  **(CI)** | **OR**  **(CI)** | **OR**  **(CI)** | **OR**  **(CI)** | **OR**  **(CI)** | **OR**  **(CI)** |
| Sleep Problems | **2.54**  **(2.06-3.13)** | - | **2.71**  **(2.24-3.28)** | - | **1.89**  **(1.55-2.29)** | - |
| Sleep Duration | - | **.90**  **(.81-.99)** | - | **.86**  **(.77-.96)** | - | **.84**  **(.76-.93)** |
|  | **Preteen Delinquency** | | | | | |
| ***Predictors*** | **OR**  **(CI)** | **OR**  **(CI)** | **OR**  **(CI)** | **OR**  **(CI)** | **OR**  **(CI)** | **OR**  **(CI)** |
| Sleep Problems | 1.22  (.98-1.52) | **1.54**  **(1.25-1.90)** | 1.15  (.92-1.44) | **-** | - | **-** |
| Sleep Duration | - | **-** | - | **.86**  **(.77-.96)** | **.86**  **(.77-.95)** | **.86**  **(.77-.96)** |
| ADHD Symptomatology | **6.27**  **(4.89-8.05)** |  | **4.99**  **(3.83-6.49)** | **6.82**  **(5.34-8.71)** |  | **5.24**  **(4.04-6.79)** |
| ADHD Diagnosis |  | **4.14**  **(3.14-5.47)** | **2.44**  **(1.80-3.29)** |  | **4.70**  **(3.59-6.15)** | **2.58**  **(1.92-3.47)** |

Supplementary Table 4: Sleep and Preteen Delinquency: Does ADHD Symptomatology and/or Diagnosis Attenuate the Association?[[1]](#footnote-1)

1. Models employ multiple imputation using MI commands in STATA (N = 3,288, full sample of in-home surveys). Controls for age, sex, race, household income, parental education, parental involvement, parental self-control, paternal incarceration, and parental smoking are included in each model in tables 2 and 3. OR = Odds Ratio; CI = Confidence Interval. Statistically significant ORs and CIs are bolded. [↑](#footnote-ref-1)
